# Supplementary material
Source: publisher site journal article supplement (https://www.dovepress.com/article/407595)
Supplement: Supplementary file 1 [file get_supplementary_file.php]

# Supplemental Figures

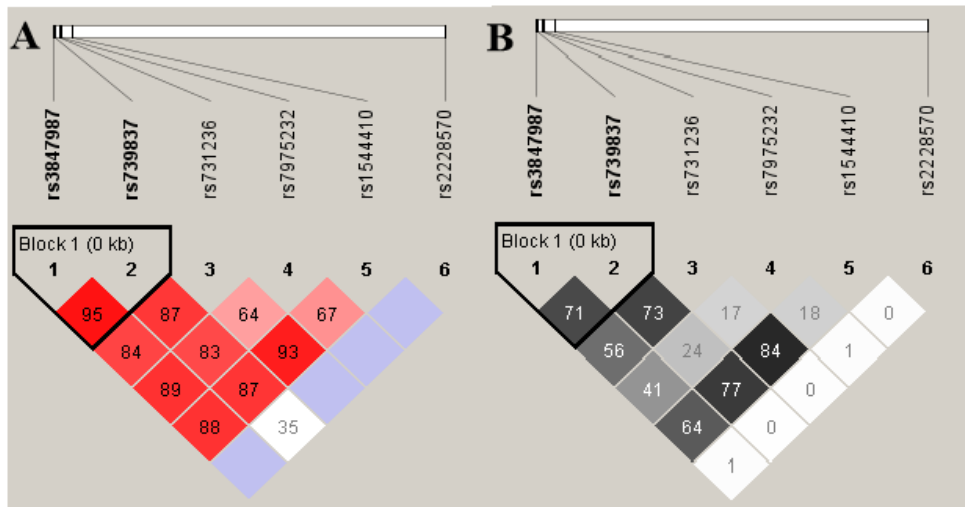

**Figure S1** Linkage disequilibrium test for SNPs of *VDR* gene between the controls and cases infected Beijing lineage of *M. tuberculosis* after PS. Figure S1A showed the  $D'$  values between each two loci, and Figure S1B showed the  $r^2$  values between each two loci.

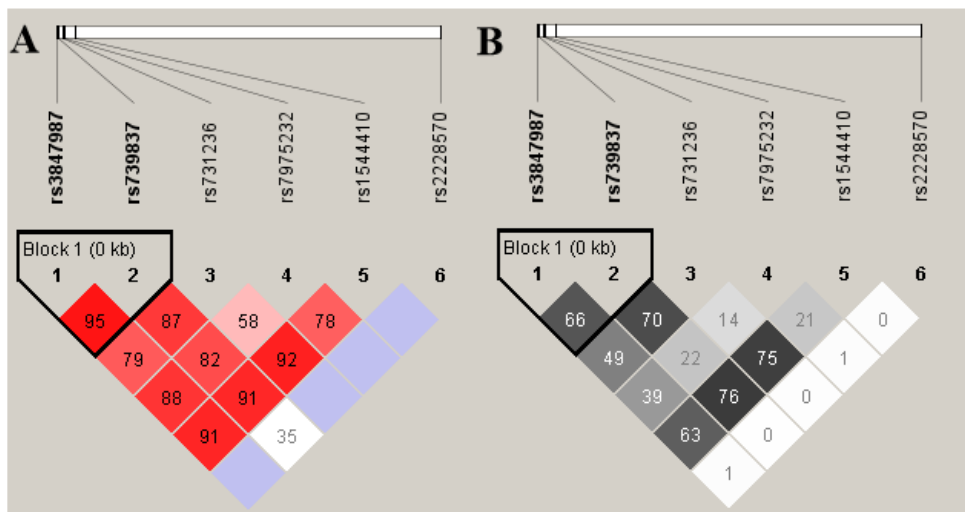

**Figure S2** Linkage disequilibrium test for SNPs of *VDR* gene between the controls and cases infected non-Beijing lineage of *M. tuberculosis* after PS. Figure S2A showed the  $D'$  values between each two loci, and Figure S2B showed the  $r^2$  values between each two loci.

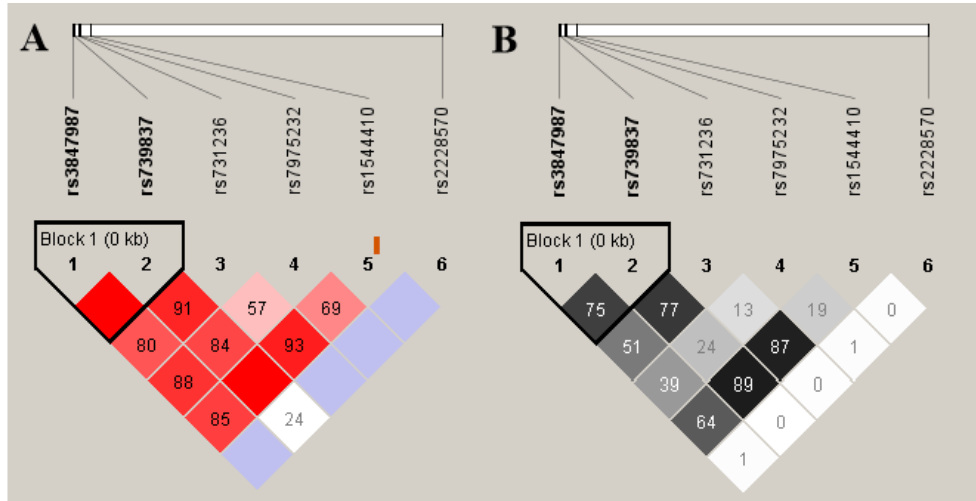

**Figure S3** Linkage disequilibrium test for SNPs of *VDR* gene among the cases infected different lineages of *M. tuberculosis*. Figure S3A showed the  $D'$  values between each two loci, and Figure S3B showed the  $r^2$  values between each two loci.

## Supplemental tables

**Table S1** The associations between haplotype distributions of *VDR* gene and Beijing lineage of *M. tuberculosis* in the population after PS

| Haplotype | Beijing          | Controls<br>(n/%) | $\chi^2$ | $P$   | OR (95%CI)         |
|-----------|------------------|-------------------|----------|-------|--------------------|
|           | lineage<br>(n/%) |                   |          |       |                    |
| CC        | 41.6(68.9)       | 56.4(58.3)        | 1.759    | 0.185 | 1.579(0.802-3.107) |
| TG        | 14.6(24.2)       | 25.3(26.1)        | 0.028    | 0.868 | 0.939(0.448-1.967) |
| TC        | 4.2(6.9)         | 15.1(15.6)        | 2.697    | 0.101 | 0.390(0.123-1.238) |

**Table S2** The associations between haplotype distributions of VDR gene and Non-Beijing lineage of *M. tuberculosis* in the population after PS

| Haplotype | Non-Beijing lineage(n/%) | Controls (n/%) | $\chi^2$ | <i>P</i> | <i>OR</i> (95% <i>CI</i> ) |
|-----------|--------------------------|----------------|----------|----------|----------------------------|
| CC        | 36.1(61.2)               | 60.4(62.6)     | 0.034    | 0.854    | 0.939(0.482-1.829)         |
| TG        | 14.7(24.9)               | 26.3(27.3)     | 0.052    | 0.820    | 0.918(0.438-1.922)         |
| TC        | 8.2(13.9)                | 9.7(10.1)      | 0.380    | 0.538    | 1.365(0.506-3.680)         |

**Table S3** The associations between haplotype distributions of VDR gene and lineages of *M. tuberculosis*

| Haplotype | Beijing lineage (n/%) | Non-Beijing lineage (n/%) | $\chi^2$ | <i>P</i> | <i>OR</i> (95% <i>CI</i> ) |
|-----------|-----------------------|---------------------------|----------|----------|----------------------------|
| CC        | 34.6(58.6)            | 36.5(62.4)                | 0.143    | 0.706    | 0.867(0.414-1.818)         |
| TG        | 18.4(31.2)            | 14.6(25.0)                | 0.379    | 0.538    | 1.288(0.575-2.885)         |
| TC        | 6.0(10.2)             | 7.4(12.6)                 | 0.107    | 0.744    | 0.825(0.260-2.621)         |
